# Supplementary material
Source: Springer Nature journal article supplement (https://www.springermedizin.de/resource/supplementary/12905_2013_375_MOESM2_ESM.pdf/9518586)
Supplement: MOESM2 [file 9518586]

**Disagree most****Agree most**

| -4 | -3   | -2 | -1 | 0   | +1   | +2   | +3   | +4   |
|----|------|----|----|-----|------|------|------|------|
| 3  | 5    | 2  | 9  | 1   | 6    | 23   | 11*  | 18   |
| 4  | 17** | 12 | 19 | 7** | 8*   | 25** | 13** | 32** |
|    | 37   | 16 | 26 | 20* | 10*  | 29   | 15   |      |
|    |      | 21 | 35 | 22  | 14** | 31   |      |      |
|    |      | 27 | 38 | 24* | 30   | 33   |      |      |
|    |      |    | 39 | 28* | 36   |      |      |      |
|    |      |    |    | 34  |      |      |      |      |
